# Supplementary material
Source: PubMed Central journal article supplement (PMC6143044)
Supplement: jamaoncol-4-1066-s001.pdf [file jamaoncol-4-1066-s001.pdf]

## Supplementary Online Content

Kurian AW, Ward KC, Hamilton AS, et al. Uptake, results, and outcomes of germline multiple-gene sequencing after diagnosis of breast cancer. *JAMA Oncol*. Published online May 10, 2018. doi:10.1001/jamaoncol.2018.0644

**eFigure 1.** Patient flow diagram

**eTable 1.** Demographic and clinical characteristics of patients by genetic test type

**eFigure 2.** Multivariable analysis among tested patients of the correlates of receiving multiple-gene sequencing versus a *BRCA1/2*-only test

**eTable 2.** Tested genes and pathogenic variants

This supplementary material has been provided by the authors to give readers additional information about their work.

## **Online-Only Material**

**eFigure 1.** Patient flow diagram, depicting the flow of patients into the study from those initially identified to the final analytic sample.

**eTable 1.** Demographic and clinical characteristics of patients by genetic test type

**eFigure 2.** Multivariable analysis among tested patients of the correlates of receiving multiple-gene sequencing versus a *BRCA1/2*-only test, n=1,316 patients with complete information for all variables in the model. Diamonds represent point estimates and bars represent 95% confidence intervals; the X-axis is on a log scale.

**eTable 2.** Tested genes and pathogenic variants

**eFigure 1.** Patient flow diagram, depicting the flow of patients into the study from those initially identified to the final analytic sample.

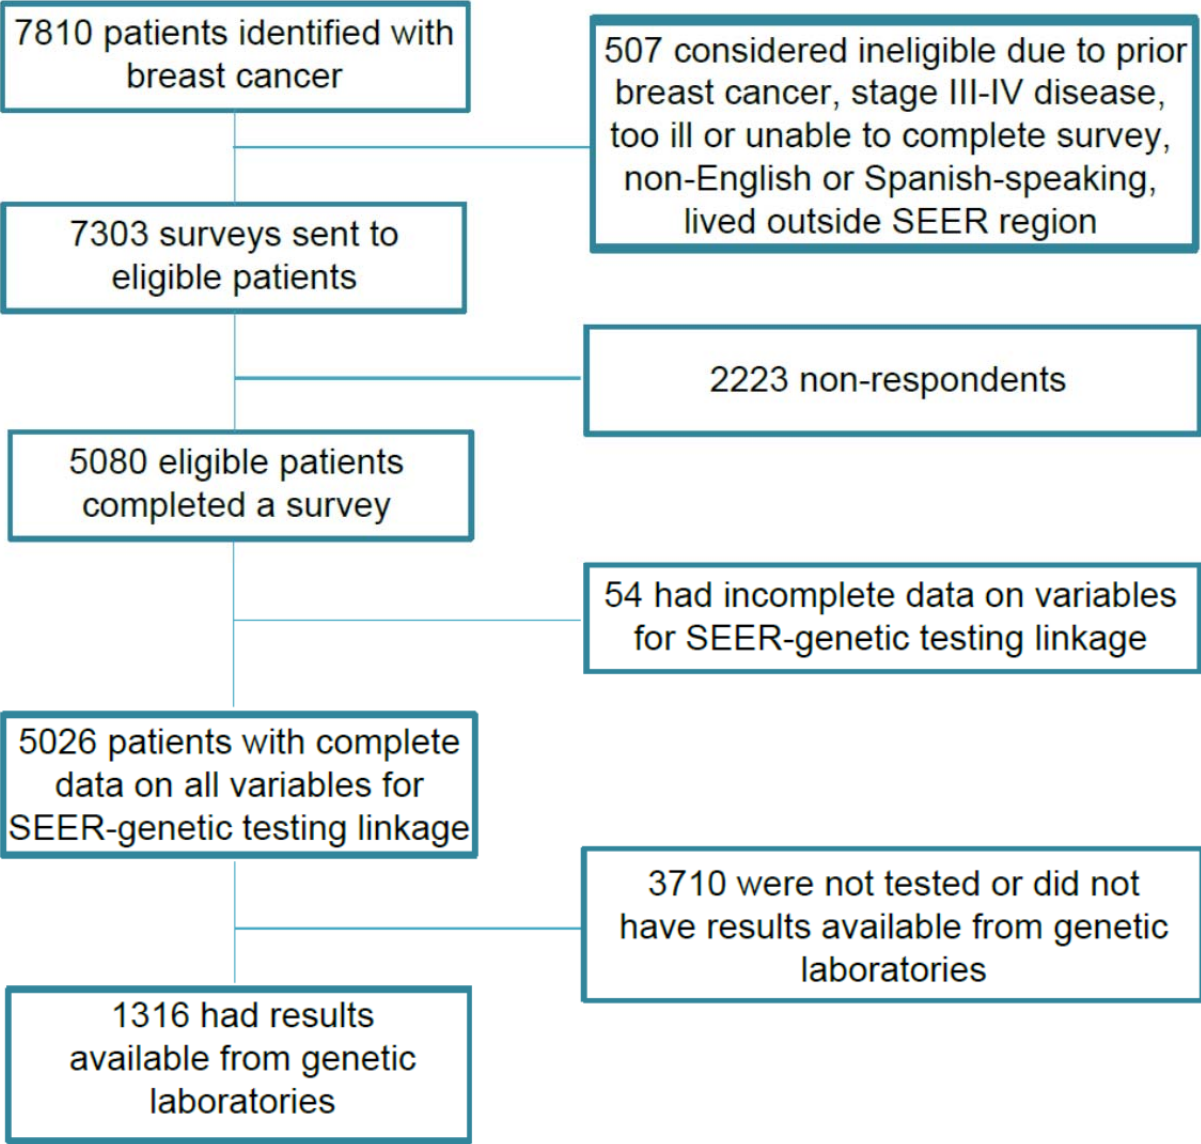

| <b>eTable 1. Demographic and Clinical Characteristics of Patients by Genetic Test Type</b> |                                                |                                                       |                                           |
|--------------------------------------------------------------------------------------------|------------------------------------------------|-------------------------------------------------------|-------------------------------------------|
|                                                                                            | <b>No Genetic Test<sup>1</sup><br/>n=3,710</b> | <b>Multiple-Gene Sequencing<sup>1</sup><br/>n=588</b> | <b>BRCA1/2-Only<sup>1</sup><br/>n=728</b> |
| <b>Test Results<sup>2</sup></b>                                                            |                                                |                                                       |                                           |
| Negative                                                                                   | -                                              | 61.6                                                  | 91.7                                      |
| Variant of Uncertain Significance only                                                     | -                                              | 29.8                                                  | 3.2                                       |
| BRCA1/2 Pathogenic Variant                                                                 | -                                              | 4.1                                                   | 5.1                                       |
| Other Gene Pathogenic Variant                                                              | -                                              | 4.6                                                   | 0.0                                       |
| <b>Age (Years)</b>                                                                         |                                                |                                                       |                                           |
| ≥50                                                                                        | 94.3                                           | 64.6                                                  | 59.6                                      |
| <50                                                                                        | 5.7                                            | 35.4                                                  | 40.4                                      |
| <b>Geographic Site<sup>3</sup></b>                                                         |                                                |                                                       |                                           |
| Georgia                                                                                    | 52.0                                           | 61.3                                                  | 54.4                                      |
| Los Angeles County                                                                         | 48.0                                           | 38.7                                                  | 45.6                                      |
| <b>Race/Ethnicity</b>                                                                      |                                                |                                                       |                                           |
| White, non-Hispanic                                                                        | 53.2                                           | 61.7                                                  | 61.7                                      |
| Black                                                                                      | 19.3                                           | 15.2                                                  | 13.2                                      |
| Hispanic                                                                                   | 15.4                                           | 10.8                                                  | 15.0                                      |
| Asian                                                                                      | 9.6                                            | 9.9                                                   | 7.5                                       |
| Other or unknown                                                                           | 2.5                                            | 2.4                                                   | 2.5                                       |
| <b>Education</b>                                                                           |                                                |                                                       |                                           |
| High school graduate or less                                                               | 32.5                                           | 17.8                                                  | 16.6                                      |
| Some college                                                                               | 30.4                                           | 25.3                                                  | 31.7                                      |
| College graduate or more                                                                   | 34.9                                           | 53.8                                                  | 51.0                                      |
| Missing                                                                                    | 2.1                                            | 3.2                                                   | 0.7                                       |
| <b>Marital Status</b>                                                                      |                                                |                                                       |                                           |
| Not married                                                                                | 41.7                                           | 31.8                                                  | 29.3                                      |
| Married or partnered                                                                       | 58.3                                           | 68.2                                                  | 70.7                                      |
| <b>Income</b>                                                                              |                                                |                                                       |                                           |
| <\$20,000                                                                                  | 16.3                                           | 8.6                                                   | 7.6                                       |
| \$20,000 - \$60,000                                                                        | 28.9                                           | 24.5                                                  | 25.3                                      |
| ≥\$60,000                                                                                  | 35.3                                           | 54.6                                                  | 52.6                                      |
| Missing                                                                                    | 19.5                                           | 12.3                                                  | 14.7                                      |
| <b>Insurance</b>                                                                           |                                                |                                                       |                                           |
| Medicaid                                                                                   | 10.5                                           | 8.6                                                   | 7.0                                       |
| Medicare and/or Veteran's Affairs                                                          | 35.3                                           | 16.5                                                  | 16.9                                      |

|                                               |      |      |      |
|-----------------------------------------------|------|------|------|
| Private or other                              | 53.2 | 73.4 | 75.7 |
| None                                          | 1.0  | 1.6  | 0.5  |
| <b>Comorbidities</b>                          |      |      |      |
| None                                          | 54.6 | 63.6 | 61.9 |
| One                                           | 30.3 | 26.1 | 30.1 |
| Two or more                                   | 15.1 | 10.3 | 8.0  |
| <b>Tumor Grade</b>                            |      |      |      |
| Grade 1                                       | 23.8 | 20.2 | 19.3 |
| Grade 2                                       | 46.3 | 39.7 | 44.5 |
| Grade 3                                       | 26.6 | 34.7 | 32.5 |
| Unknown                                       | 3.3  | 5.4  | 3.7  |
| <b>Stage</b>                                  |      |      |      |
| 0                                             | 25.8 | 29.0 | 26.5 |
| I                                             | 49.1 | 46.9 | 45.6 |
| II                                            | 24.2 | 22.5 | 27.4 |
| Missing                                       | 0.9  | 1.6  | 0.6  |
| <b>Tumor T Stage and Size</b>                 |      |      |      |
| Tis ( <i>in situ</i> )                        | 25.8 | 29.0 | 26.5 |
| T1 (<2 centimeters (cm))                      | 55.2 | 52.1 | 49.7 |
| T2 (2-5 cm)                                   | 18.2 | 17.8 | 23.2 |
| TX (missing)                                  | 0.8  | 1.1  | 0.6  |
| <b>Estrogen/Progesterone Receptor (ER/PR)</b> |      |      |      |
| ER positive only                              | 12.5 | 11.4 | 10.6 |
| PR positive only                              | 0.7  | 0.4  | 0.9  |
| ER and PR both positive                       | 73.6 | 72.4 | 72.7 |
| Neither ER nor PR positive                    | 13.2 | 15.8 | 15.8 |
| <b>HER2 Status</b>                            |      |      |      |
| HER2 negative                                 | 63.9 | 61.6 | 65.3 |
| HER2 positive                                 | 8.8  | 9.4  | 10.5 |
| Missing or borderline                         | 27.3 | 29.0 | 24.2 |
| <b>Axillary Lymph Node Involvement</b>        |      |      |      |
| No                                            | 47.8 | 42.8 | 40.0 |
| Yes                                           | 51.8 | 56.8 | 60.0 |
| Missing                                       | 0.4  | 0.4  | 0.0  |
| <b>Surgical Treatment</b>                     |      |      |      |
| Breast conserving surgery                     | 66.4 | 47.5 | 49.9 |

|                                                      |      |      |      |
|------------------------------------------------------|------|------|------|
| Unilateral mastectomy                                | 20.2 | 13.2 | 14.2 |
| Contralateral prophylactic mastectomy                | 11.9 | 38.1 | 35.4 |
| Missing                                              | 1.5  | 1.2  | 0.5  |
| <b>Patient Pre-Test Risk of Mutation<sup>4</sup></b> |      |      |      |
| Average risk                                         | 81.1 | 45.5 | 46.5 |
| Higher risk                                          | 18.9 | 54.5 | 53.5 |
| <b>Tumor Laterality</b>                              |      |      |      |
| Unilateral                                           | 95.5 | 90.5 | 91.0 |
| Bilateral                                            | 4.6  | 9.5  | 9.0  |

<sup>1</sup>We used survey design and non-response weights to compensate for the differential probability of patient selection and survey non-response among subgroups with various characteristics. Weighted percentages are shown.

<sup>2</sup>Significantly different at 0.01 confidence level based on chi square test

<sup>3</sup>Significantly different at 0.05 confidence level based on chi square test

<sup>4</sup>Patients were considered at higher pre-test risk if they had any of the following: age at breast cancer diagnosis  $\leq 45$  years, triple-negative breast cancer diagnosed at age  $< 60$ ; any relative with ovarian cancer, sarcoma or male breast cancer; two or more first-degree relatives with breast cancer (for patients diagnosed at  $\leq 50$ , one or more first-degree relative with breast cancer); Ashkenazi Jewish ancestry; or family history of a pathogenic variant conferring high risk (e.g., *BRCA1/2*), consistent with criteria for genetic testing according to guidelines of the National Comprehensive Cancer Network.

**eFigure 2.** Multivariable analysis among tested patients of the correlates of receiving multiple-gene sequencing versus a *BRCA1/2*-only test, n=1,316 patients with complete information for all variables in the model. Diamonds represent point estimates and bars represent 95% confidence intervals; the X-axis is on a log scale.

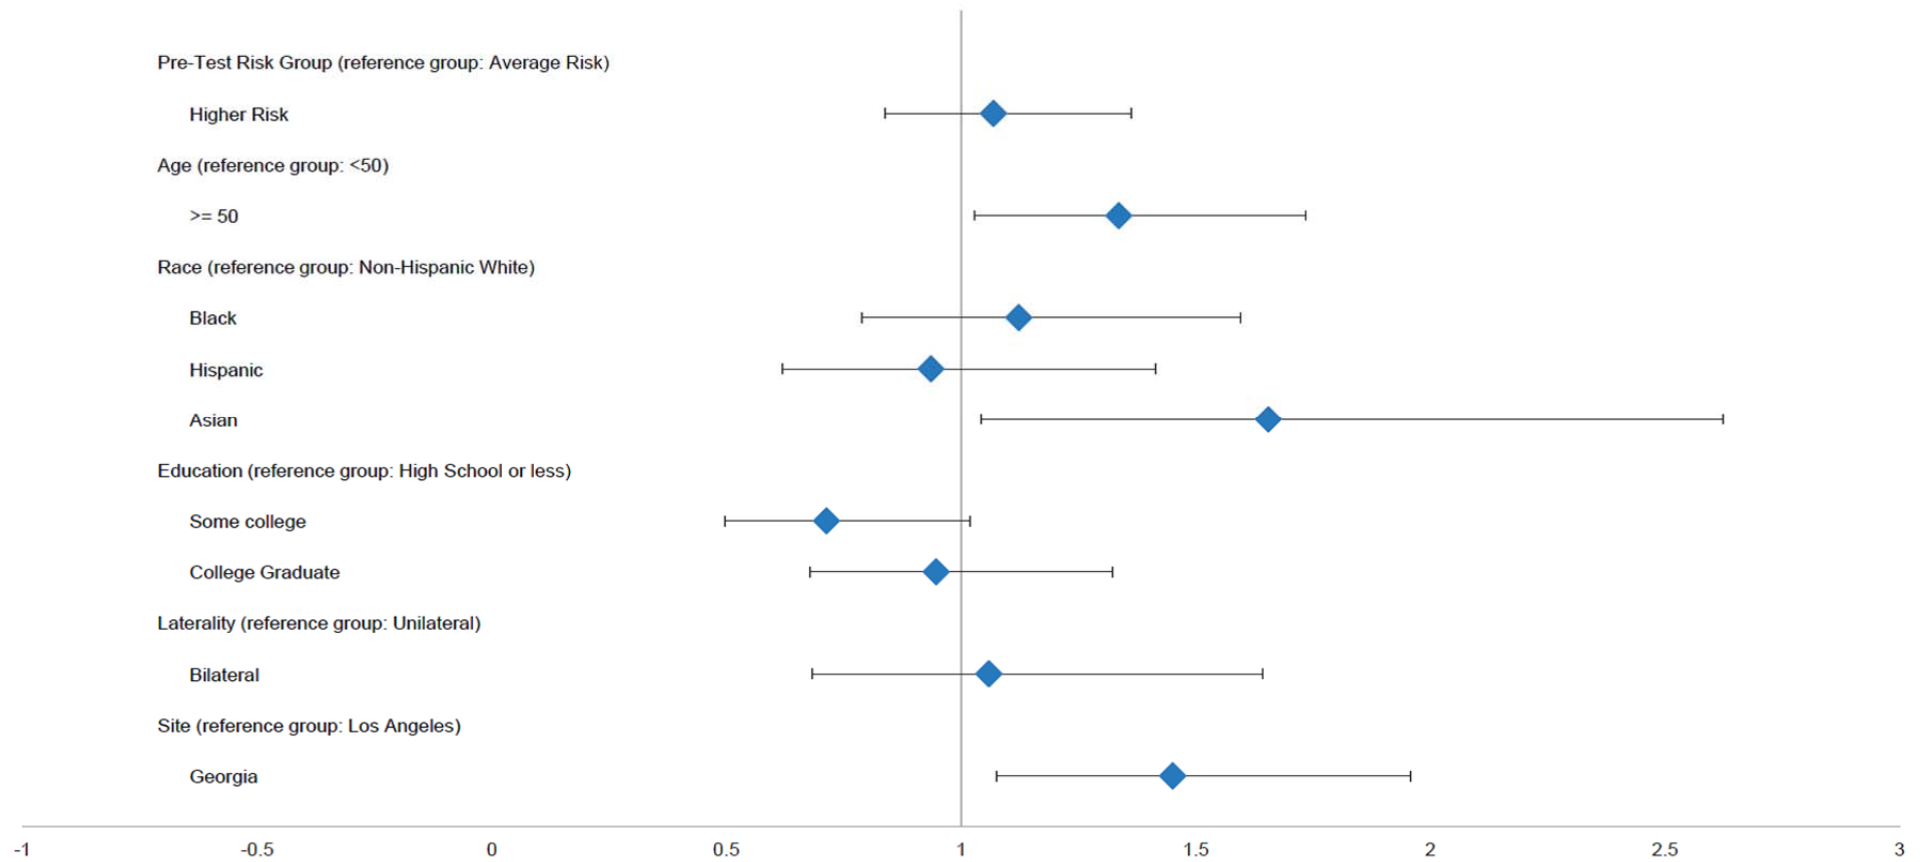

| <b>eTable 2: Tested Genes* and Pathogenic Variants</b> |                         |
|--------------------------------------------------------|-------------------------|
| Gene Name                                              | Pathogenic Variants (n) |
| <i>APC</i>                                             | 2                       |
| <i>ATM</i> <sup>†</sup>                                | 3                       |
| <i>AXIN2</i>                                           | 0                       |
| <i>BAP1</i>                                            | 0                       |
| <i>BARD1</i>                                           | 1                       |
| <i>BMPR1A</i>                                          | 0                       |
| <i>BRCA1</i> <sup>†</sup>                              | 32                      |
| <i>BRCA2</i> <sup>†</sup>                              | 32                      |
| <i>BRIP1</i>                                           | 2                       |
| <i>CDH1</i> <sup>†</sup>                               | 0                       |
| <i>CDK4</i>                                            | 0                       |
| <i>CDKN2A</i>                                          | 0                       |
| <i>CHEK2</i> <sup>†</sup>                              | 4                       |
| <i>EPCAM</i>                                           | 0                       |
| <i>FANCC</i>                                           | 0                       |
| <i>FH</i>                                              | 0                       |
| <i>FLCN</i>                                            | 0                       |
| <i>GREM1</i>                                           | 0                       |
| <i>MEN1</i>                                            | 0                       |
| <i>MET</i>                                             | 0                       |
| <i>MITF</i>                                            | 0                       |
| <i>MLH1</i>                                            | 1                       |
| <i>MRE11A</i>                                          | 0                       |
| <i>MSH2</i>                                            | 0                       |
| <i>MSH6</i>                                            | 1                       |
| <i>MUTYH</i>                                           | 0                       |
| <i>NBN</i> <sup>†</sup>                                | 1                       |
| <i>NF1</i> <sup>†</sup>                                | 1                       |
| <i>PALB2</i> <sup>†</sup>                              | 3                       |
| <i>PMS2</i>                                            | 2                       |
| <i>POLD1</i>                                           | 0                       |
| <i>POLE</i>                                            | 0                       |
| <i>PTEN</i> <sup>†</sup>                               | 0                       |
| <i>RAD50</i>                                           | 1                       |
| <i>RAD51C</i>                                          | 2                       |
| <i>RAD51D</i>                                          | 1                       |
| <i>RET</i>                                             | 0                       |



|                          |   |
|--------------------------|---|
| <i>SDHA</i>              | 0 |
| <i>SDHAF2</i>            | 0 |
| <i>SDHB</i>              | 0 |
| <i>SDHC</i>              | 0 |
| <i>SDHD</i>              | 0 |
| <i>SMAD4</i>             | 0 |
| <i>SMARCA4</i>           | 0 |
| <i>STK11<sup>†</sup></i> | 0 |
| <i>TMEM127</i>           | 0 |
| <i>TP53<sup>†</sup></i>  | 0 |
| <i>TSC1</i>              | 0 |
| <i>TSC2</i>              | 0 |
| <i>VHL</i>               | 0 |
| <i>XRCC2</i>             | 0 |

\*Genes tested in any patient and reported by any of the four participating laboratories were included

<sup>†</sup>Specified as breast cancer susceptibility genes by 2017 National Comprehensive Cancer Network Guidelines
